# Supplementary material
Source: PubMed Central journal article supplement (PMC5443322)
Supplement: jc.2016-3722.st1.pdf [file jc.2016-3722.st1.pdf]

Online Supporting Material

Supplementary Table 1: Genotypic association of 16 candidate SNPs with Liver fat fraction and metabolic parameters.

| Gene       | SNP        | Functional annotation | Allele     |            |      | Genotype Count | Phenotypic Association |           |                              |                          |
|------------|------------|-----------------------|------------|------------|------|----------------|------------------------|-----------|------------------------------|--------------------------|
|            |            |                       | A1 (minor) | A2 (major) | MAF  |                | (A1/A1, A1/A2, A2/A2)  | Phenotype | Effect allele                | Beta ± SE (95% LCI, UCI) |
| LYPLAL1    | rs12137855 |                       | T          | C          | 0.28 | 3/19/21        |                        |           |                              |                          |
| GCKR       | rs780094   | intron                | T          | C          | 0.33 | 3/22/18        | HbA1c                  | T         | 0.036±0.013<br>(0.006,0.064) | 0.021*                   |
|            |            |                       |            |            |      |                | Liver fat              | T         | 0.705±0.29<br>(0.14,1.27)    | 0.019*                   |
|            |            |                       |            |            |      |                | Triglyceride           | T         | 0.242±0.1<br>(0.041,0.44)    | 0.023*                   |
| PPAR gamma | rs1805192  | missense              | -          | C          | 0.00 | 0/0/43         |                        |           |                              |                          |
| FDFT1      | rs2645424  | intron                | A          | G          | 0.44 | 8/20/14        |                        |           |                              |                          |
| PPP1R3B    | rs4240624  | intron                | G          | A          | 0.09 | 0/8/35         |                        |           |                              |                          |
| COL13A1    | rs1227756  | intron                | G          | A          | 0.45 | 10/19/14       |                        |           |                              |                          |
| TCF7L2     | rs7903146  | intron                | T          | C          | 0.30 | 3/19/21        | Liver fat              | T         | -0.553±0.23                  | 0.023 <sup>#</sup>       |

Online Supporting Material

|            |            |                                  |   |   |      |         |              |   |                                |                    |  |
|------------|------------|----------------------------------|---|---|------|---------|--------------|---|--------------------------------|--------------------|--|
|            |            |                                  |   |   |      |         |              |   |                                | (-1.01,-0.096)     |  |
| APOC3      | rs2854116  | near-gene-5'                     | C | T | 0.39 | 5/23/15 |              |   |                                |                    |  |
| APOC3      | rs2854117  | near-gene-5'                     | T | C | 0.24 | 0/20/23 |              |   |                                |                    |  |
| EFCAB4B    | rs887304   | intron,untranslated-3'           | A | G | 0.26 | 4/15/24 |              |   |                                |                    |  |
| SREBF-1c   | rs11868035 | near-gene 3',<br>untranslated-3' | T | C | 0.28 | 3/16/20 | Triglyceride | T | -0.189±0.081<br>(-0.35,-0.031) | 0.025 <sup>#</sup> |  |
| PEMT       | rs7946     | missense                         | G | A | 0.22 | 3/13/27 |              |   |                                |                    |  |
| NCAN       | rs2228603  | missense                         | T | C | 0.11 | 1/8/34  | 2hr Glucose  | T | 0.159±0.06<br>(0.03,0.28)      | 0.018 <sup>*</sup> |  |
| PPAR alpha | rs1800234  | missense                         | - | T | 0.00 | 0/0/43  |              |   |                                |                    |  |
| PNPLA3     | rs6006460  | missense                         | - | G | 0.00 | 0/0/43  |              |   |                                |                    |  |
| PNPLA3     | rs738409   | missense                         | G | C | 0.23 | 3/13/27 |              |   |                                |                    |  |

MAF, Minor allele frequency; SNP, Single nucleotide polymorphism; \*p value from dominant genetic model, <sup>#</sup> p value from additive genetic model.

SE; standard error of beta, UCI and LCI, upper and lower confidence interval of beta.
